# Supplementary material for: SerpinB10, a Serine Protease Inhibitor, Is Implicated in UV-Induced Cellular Response
Source: MDPI journal article supplement (doi:10.3390/ijms22168500), 2021-08-07
Supplement: s1 [file s1]

| gene symbol      | fold change<br>(log <sub>2</sub> ) | gene symbol      | fold change<br>(log <sub>2</sub> ) |
|------------------|------------------------------------|------------------|------------------------------------|
| <i>SerpinA1</i>  | no change                          | <i>SerpinB2</i>  | 1.495                              |
| <i>SerpinA2</i>  | no change                          | <i>SerpinB5</i>  | no change                          |
| <i>SerpinA4</i>  | no change                          | <i>SerpinB9</i>  | no change                          |
| <i>SerpinA5</i>  | no change                          | <i>SerpinB10</i> | 4.253                              |
| <i>SerpinA6</i>  | no change                          | <i>SerpinB13</i> | 1.180                              |
| <i>SerpinA8</i>  | no change                          | <i>SerpinC1</i>  | no change                          |
| <i>SerpinA9</i>  | no change                          | <i>SerpinD1</i>  | no change                          |
| <i>SerpinA10</i> | no change                          | <i>SerpinF2</i>  | no change                          |
| <i>SerpinA11</i> | no change                          | <i>SerpinF3</i>  | no change                          |
| <i>SerpinA12</i> | no change                          | <i>SerpinG1</i>  | no change                          |
| <i>SerpinA13</i> | no change                          | <i>SerpinH1</i>  | no change                          |

**Figure S1: UV irradiation contributes to overexpression of *SPB2*, *SPB10*, and *SPB13* genes (80 mJ/cm<sup>2</sup>):** UV damage-induced log<sub>2</sub> expression changes of the Serpin family members in Hker E6SFM keratinocytes detected by microarray.

**A**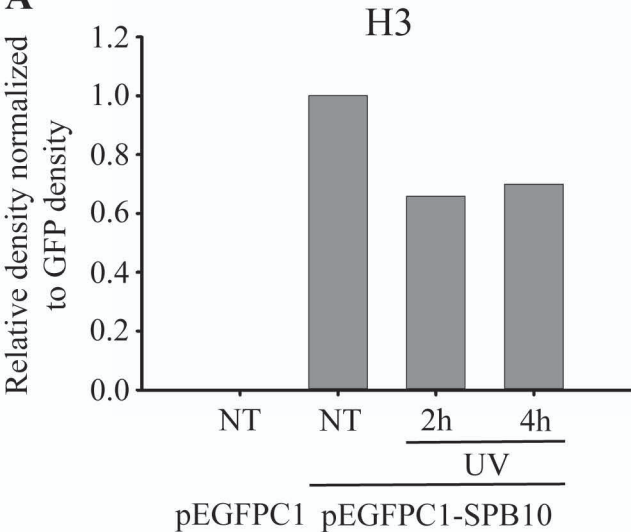**B**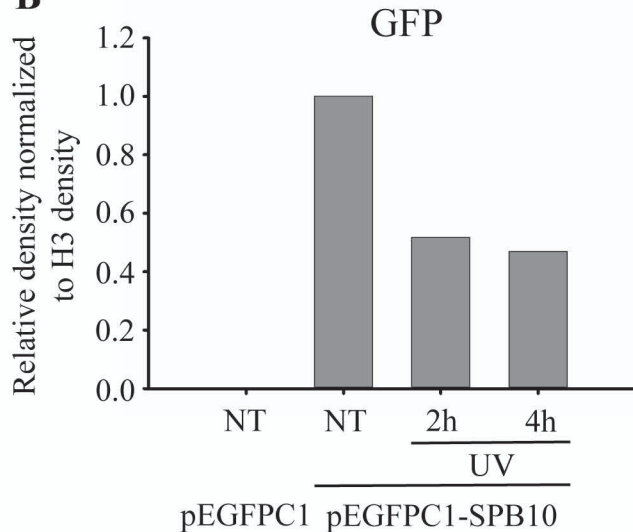

**Figure S2:** Relative density of chemiluminescent signals detected with (A) anti-H3 and (B) anti-GFP antibody in Western blots shown in Figure 4 was normalized to signal density of immunoprecipitated (A) GFP and (B) H3 with Fiji ImageJ.
